# Supplementary material
Source: PubMed Central journal article supplement (PMC3494945)
Supplement: 1211507109_pnas.201211507SI.pdf [file 1211507109_pnas.201211507SI.pdf]

# Supporting Information

Meechan et al. 10.1073/pnas.1211507109

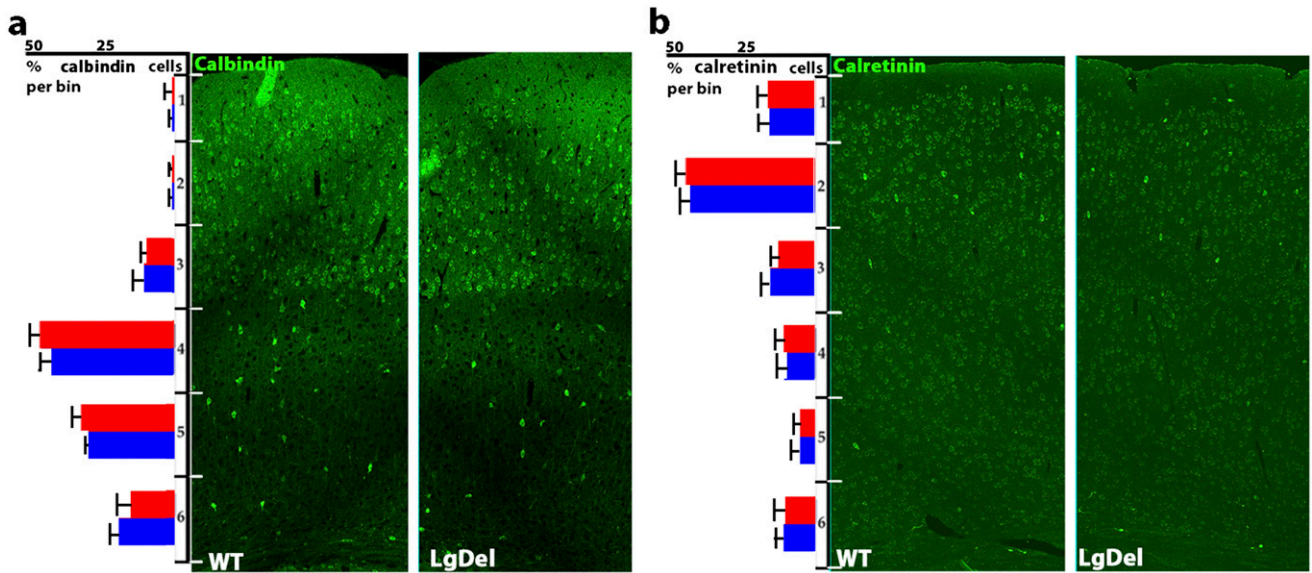

**Fig. S1.** Assessment of calbindin and calretinin interneuron distribution in postnatal day 21 (P21) cortex. Counting boxes (600- $\mu$ m wide, divided into equidistant bins) spanning the cortex between the pial surface and the white matter tract were analyzed in lateral, medial, and dorsal locations in coronal P21 brain sections. No significant differences were observed in the number or distribution of calbindin (A) or calretinin (B) interneurons between *Large Deletion* (*LgDel*) and WT samples. (Medial probe location is shown.)

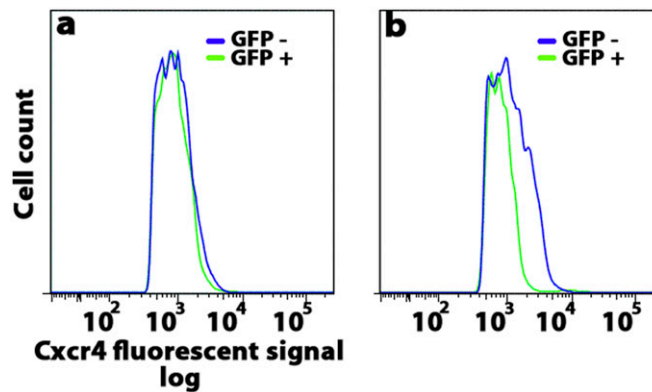

**Fig. S2.** Cell-surface labeling of Cxcr4 protein by fluorescently conjugated anti-Cxcr4 antibody was measured in dissociated embryonic day 14.5 (E14.5) cortical cells using flow cytometry. (A) A representative flow cytometry plot showing Cxcr4 cell-surface fluorescent signal of *Dlx5/6*-CIE-positive (green plot) and *Dlx5/6*-CIE-negative (blue plot) cortical cells dissociated from the same WT embryo. (B) A representative flow cytometry plot showing Cxcr4 cell-surface fluorescent signal of *Dlx5/6*-CIE-positive and -negative cortical cells from a WT embryo that contains one floxed *Cxcr4* allele. Cxcr4 fluorescent signal is reduced only in cells that are *Dlx5/6*-CIE-positive (GFP<sup>+</sup> and Cre recombinase-positive), indicating specific and successful excision of the *Cxcr4* allele only in these cells.

**Table S1. Microarray results of *Dlx5/6*-CIE-labeled cortical interneurons**

| WT signal | LgDel signal | Fold-change | Gene symbol | Gene                                                                                     |
|-----------|--------------|-------------|-------------|------------------------------------------------------------------------------------------|
| 366.5851  | 720.858      | 0.51        | Fbl         | Fibrillarin                                                                              |
| 550.8332  | 948.8289     | 0.58        | Ppp1r14b    | Protein phosphatase 1, regulatory (inhibitor) subunit 14B                                |
| 1056.56   | 1764.297     | 0.60        | Dip2c       | DIP2 disco-interacting protein 2 homolog C ( <i>Drosophila</i> )                         |
| 760.4257  | 1246.119     | 0.61        | Auts2       | Autism susceptibility candidate 2                                                        |
| 1157.731  | 1872.705     | 0.62        | Sppl3       | Signal peptide peptidase 3                                                               |
| 962.9722  | 1466.667     | 0.66        | Mark2       | MAP/microtubule affinity-regulating kinase 2                                             |
| 1069.828  | 1588.752     | 0.67        | Zfp57       | Zinc finger protein 57                                                                   |
| 2096.382  | 3105.481     | 0.68        | Sepw1       | Selenoprotein W, muscle 1                                                                |
| 1003.254  | 1400.452     | 0.72        | Stmn3       | Stathmin-like 3                                                                          |
| 2085.566  | 2903.5       | 0.72        | Cux2        | Cut-like homeobox 2                                                                      |
| 909.4592  | 1265.924     | 0.72        | Septin3     | Septin 3                                                                                 |
| 711.4436  | 989.7512     | 0.72        | Ctnnd2      | Catenin (cadherin-associated protein), delta 2                                           |
| 727.4034  | 1002.117     | 0.73        | Foxj3       | Forkhead box J3                                                                          |
| 1042.29   | 1410.103     | 0.74        | Dcakd       | Dephospho-CoA kinase domain containing                                                   |
| 1656.865  | 2240.173     | 0.74        | Dlgap1      | Discs, large ( <i>Drosophila</i> ) homolog-associated protein 1                          |
| 2471.591  | 3331.726     | 0.74        | Nxph1       | Neurexophilin 1                                                                          |
| 1095.964  | 1472.2       | 0.74        | Ctxn1       | Cortexin 1                                                                               |
| 1563.04   | 2096.014     | 0.75        | Vamp2       | Vesicle-associated membrane protein 2                                                    |
| 1665.494  | 2214.071     | 0.75        | Chd3        | Chromodomain helicase DNA binding protein 3                                              |
| 1445.328  | 1876.538     | 0.77        | Celf3       | VCUGBP, Elav-like family member 3                                                        |
| 1295.377  | 1680.633     | 0.77        | Atat1       | $\alpha$ -Tubulin acetyltransferase 1                                                    |
| 1588.189  | 2038.454     | 0.78        | Zfp706      | Zinc finger protein 706                                                                  |
| 902.6028  | 1156.062     | 0.78        | Lhx6        | LIM homeobox protein 6                                                                   |
| 789.4371  | 1010.435     | 0.78        | Calm3       | Calmodulin 3                                                                             |
| 916.0685  | 1153.895     | 0.79        | Plxna2      | Plexin A2                                                                                |
| 776.321   | 975.058      | 0.80        | Cux1        | Cut-like homeobox 1                                                                      |
| 1688.898  | 2116.692     | 0.80        | Slain1      | SLAIN motif family, member 1                                                             |
| 994.4494  | 1245.142     | 0.80        | Ywhah       | Tyrosine 3-monooxygenase/tryptophan 5-monooxygenase activation protein, eta polypeptide  |
| 838.1426  | 1047.689     | 0.80        | Dusp1       | Dual specificity phosphatase 1                                                           |
| 2849.227  | 3541.741     | 0.80        | Tecr        | Trans-2,3-enoyl-CoA reductase                                                            |
| 825.1348  | 1019.732     | 0.81        | MacroD2     | MACRO domain containing 2                                                                |
| 891.0898  | 1092.161     | 0.82        | Lsm12       | LSM12 homolog ( <i>S. cerevisiae</i> )                                                   |
| 1714.049  | 2098.656     | 0.82        | Dlx1        | Distal-less homeobox 1                                                                   |
| 1477.302  | 1799.967     | 0.82        | Gad2        | Glutamic acid decarboxylase 2                                                            |
| 936.4372  | 1136.487     | 0.82        | Mex3b       | Mex3 homolog B ( <i>C. elegans</i> )                                                     |
| 783.369   | 948.7254     | 0.83        | Ank3        | Ankyrin 3, epithelial                                                                    |
| 908.9832  | 1088.743     | 0.83        | Ptprd       | Protein tyrosine phosphatase, receptor type, D                                           |
| 1117.204  | 1326.444     | 0.84        | Mapk8       | Mitogen-activated protein kinase 8                                                       |
| 1116.761  | 1318.982     | 0.85        | Mapk10      | Mitogen-activated protein kinase 10                                                      |
| 852.4502  | 1004.727     | 0.85        | Wdfy3       | WD repeat and FYVE domain containing 3                                                   |
| 1865.172  | 2195.219     | 0.85        | Myo18b      | Myosin XVIIIb                                                                            |
| 2427.399  | 2853.562     | 0.85        | Cxcr4       | Chemokine (C-X-C motif) receptor 4                                                       |
| 1494.997  | 1742.484     | 0.86        | Efnb2       | Ephrin B2                                                                                |
| 1314.085  | 1050.263     | 1.25        | Syngap1     | Synaptic Ras GTPase activating protein 1 homolog (rat)                                   |
| 1853.097  | 1475.546     | 1.26        | Ube2l3      | Ubiquitin-conjugating enzyme E2L 3                                                       |
| 3327.537  | 2648.795     | 1.26        | Ywhaz       | Tyrosine 3-monooxygenase/tryptophan 5-monooxygenase activation protein, zeta polypeptide |
| 1202.928  | 957.3133     | 1.26        | Luc7l3      | LUC7-like 3 ( <i>S. cerevisiae</i> )                                                     |
| 1584.821  | 1260.298     | 1.26        | Tpm3        | Tropomyosin 3, gamma                                                                     |
| 1855.987  | 1472.278     | 1.26        | Rab2a       | RAB2A, member RAS oncogene family                                                        |
| 2443.298  | 1935.401     | 1.26        | Csrnp3      | Cysteine-serine-rich nuclear protein 3                                                   |
| 1292.005  | 1021.467     | 1.26        | Dact1       | Dapper homolog 1, antagonist of beta-catenin ( <i>Xenopus</i> )                          |
| 2386.115  | 1880.076     | 1.27        | Ddx5        | DEAD (Asp-Glu-Ala-Asp) box polypeptide 5                                                 |
| 1552.606  | 1220.51      | 1.27        | Aff4        | AF4/FMR2 family, member 4                                                                |
| 1311.399  | 1028.731     | 1.27        | Pfn2        | Profilin 2                                                                               |
| 2547.238  | 1993.3       | 1.28        | Nedd4       | Neural precursor cell expressed, developmentally down-regulated 4                        |
| 1338.838  | 1043.379     | 1.28        | Camsap111   | Calmodulin regulated spectrin-associated protein 1-like 1                                |
| 1406.749  | 1089.912     | 1.29        | Paip2       | Polyadenylate-binding protein-interacting protein 2                                      |
| 1005.523  | 771.3785     | 1.30        | Spin1       | Spindlin 1                                                                               |
| 2187.384  | 1671.031     | 1.31        | Usmg5       | Up-regulated during skeletal muscle growth 5                                             |
| 1201.904  | 911.8586     | 1.32        | Srsf3       | Serine/arginine-rich splicing factor 3                                                   |
| 2793.839  | 2092.908     | 1.33        | Eif1        | Eukaryotic translation initiation factor 1                                               |





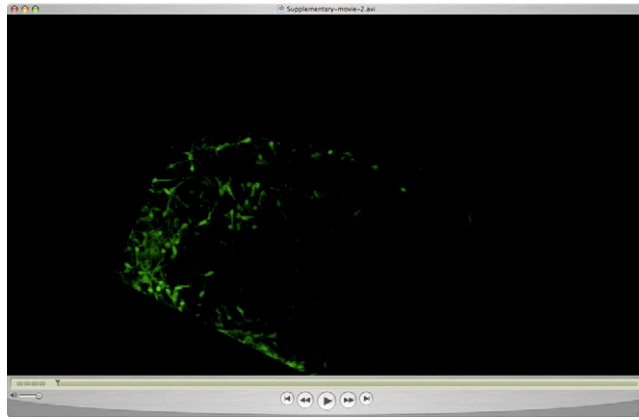

**Movie S2.** Live imaging of tangential cortical interneuron migration for 6.5 h in E13.5 *LgDel* forebrain slices.

[Movie S2](#)

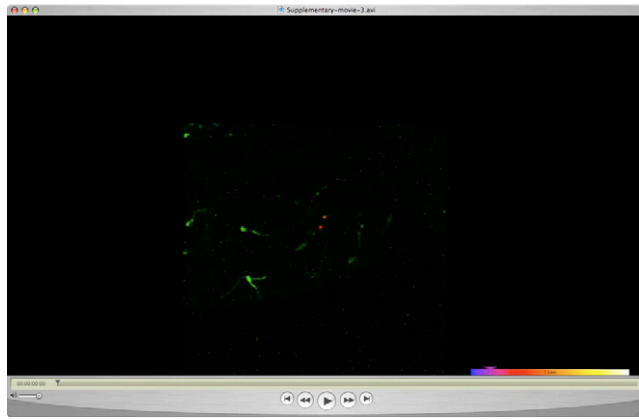

**Movie S3.** Live imaging of radial cortical interneuron migration in E13.5 WT forebrain slices.

[Movie S3](#)

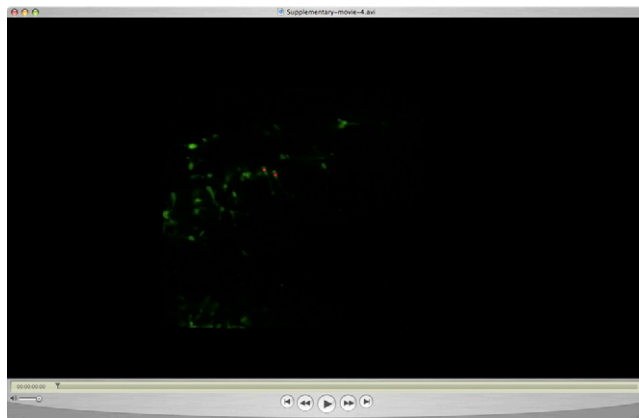

**Movie S4.** Live imaging of radial cortical interneuron migration in E13.5 *LgDel* forebrain slices.

[Movie S4](#)
